# Supplementary material for: Winter Green Manure Decreases Subsoil Nitrate Accumulation and Increases N Use Efficiencies of Maize Production in North China Plain
Source: MDPI journal article supplement (doi:10.3390/plants12020311), 2023-01-09
Supplement: s1 [file s1]

Table S1. Primer pairs and PCR conditions for quantitative PCR

| Target genes     | Primer        | Sequence (5'-3')       | Amplification<br>efficiency<br>(R2 > 0.99)<br>(%) | References          |
|------------------|---------------|------------------------|---------------------------------------------------|---------------------|
| AOA- <i>amoA</i> | Arch-amoA26F  | STAATGGTCTGGCTTAGACG   | 96.10                                             | (Wang et al., 2019) |
|                  | Arch-amoA417R | GCGGCCATCCATCTGTATGT   |                                                   |                     |
| AOB- <i>amoA</i> | amoB-1F       | GGGGTTTCTACTGGTGGT     | 94.90                                             | (Wang et al., 2019) |
|                  | amoB-2R       | CCCCTCKGSAAAGCCTTCTTC  |                                                   |                     |
| <i>nirS</i>      | cd3aF         | GTSAACGTSAAGGARACSGG   | 92.35                                             | (Shi et al., 2019)  |
|                  | R3cdR         | GASTTCGGRTGSGTCTTGA    |                                                   |                     |
| <i>nirK</i>      | nirKF1aCu     | ATCATGGTSCTGCCGCG      | 92.70                                             | (Shi et al., 2019)  |
|                  | nirKR3Cu      | GCCTCGATCAGRTTGTGGTT   |                                                   |                     |
| <i>narG</i>      | narG-1960m2f  | TAYGTSGGGCAGGARAACTG   | 91.64                                             | (Di et al., 2014)   |
|                  | narG-2050m2r  | CGTAGAAGAAGCTGGTGCTGTT |                                                   |                     |
| <i>nosZ</i>      | nosZ-1126F    | GGGCTBGGGCCRTTGCA      | 87.60                                             | (Wang et al., 2022) |
|                  | nosZ-1381R    | GAAGCGRTCCTTSGARAACTTG |                                                   |                     |

Table S2. Dry matter yield of different winter cover crops on 2021

| Treatment | Aboveground biomass<br>(kg ha <sup>-1</sup> ) | Undergroundbiomass (kg ha <sup>-1</sup> ) | Total biomass<br>(kg ha <sup>-1</sup> ) |
|-----------|-----------------------------------------------|-------------------------------------------|-----------------------------------------|
| FW        | 1050±16.51c                                   | 263±3.68c                                 | 1312±11.02c                             |
| RrG       | 3301±19.67b                                   | 2250±31.56a                               | 5551±18.84b                             |
| OrV       | 4752±27.25a                                   | 1900±13.66a                               | 6653±32.13a                             |
| VvR       | 3801±23.44b                                   | 1190±21.94b                               | 4991±10.35b                             |

Note: Different lowercase letters indicate significant differences among different cover crops ( $n = 3$ ,  $P < 0.05$ ).

Table S3. Effects of long-term cover crops on soil moisture in the soil profile.

| Depth(cm) | FW         | RrG         | VvR         | OrV         |
|-----------|------------|-------------|-------------|-------------|
| 10        | 0.33±0.02b | 0.39±0.00a  | 0.32±0.02b  | 0.42±0.01a  |
| 20        | 0.34±0.01b | 0.36±0.01b  | 0.37±0.02ab | 0.40±0.00a  |
| 30        | 0.33±0.01b | 0.37±0.01a  | 0.33±0.01b  | 0.39±0.00a  |
| 40        | 0.33±0.01b | 0.36±0.01ab | 0.33±0.02b  | 0.39±0.01a  |
| 50        | 0.30±0.00c | 0.34±0.01b  | 0.33±0.02bc | 0.40±0.01a  |
| 60        | 0.30±0.00b | 0.31±0.01b  | 0.31±0.02b  | 0.36±0.01a  |
| 70        | 0.29±0.00b | 0.29±0.01b  | 0.25±0.00c  | 0.35±0.01a  |
| 80        | 0.26±0.01c | 0.27±0.01bc | 0.29±0.01b  | 0.34±0.01a  |
| 90        | 0.23±0.00b | 0.26±0.01b  | 0.24±0.00b  | 0.33±0.00a  |
| 100       | 0.24±0.01b | 0.29±0.01a  | 0.28±0.01a  | 0.29±0.01a  |
| 120       | 0.23±0.01b | 0.25±0.01b  | 0.23±0.01b  | 0.30±0.01a  |
| 140       | 0.16±0.00b | 0.25±0.01a  | 0.27±0.01a  | 0.28±0.00a  |
| 160       | 0.18±0.01a | 0.19±0.01a  | 0.19±0.02a  | 0.20±0.01a  |
| 180       | 0.20±0.03b | 0.19±0.01b  | 0.26±0.01a  | 0.22±0.02b  |
| 200       | 0.22±0.04b | 0.24±0.01ab | 0.26±0.01a  | 0.25±0.03ab |

Results are reported as means ± SD (n = 3). Different letters within a row indicate significant differences between the treatments by LSD-Test least significant difference ( $p<0.05$ ).

Table S4. Effects of long-term cover crops on NO<sub>3</sub><sup>-</sup>N content in the soil profile.

|                                 | Depth<br>(cm) | FW          | RrG         | VvR         | OrV         |
|---------------------------------|---------------|-------------|-------------|-------------|-------------|
| NO <sub>3</sub> <sup>-</sup> -N | 10            | 14.51±1.46c | 21.11±3.49b | 27.66±1.92a | 15.69±1.71c |
|                                 | 20            | 6.83±1.16c  | 16.17±0.42a | 10.79±0.26b | 10.54±0.66b |
|                                 | 30            | 5.83±1.12a  | 6.02±1.64a  | 6.80±0.53a  | 6.33±1.31a  |
|                                 | 40            | 4.85±0.49a  | 5.98±1.01a  | 5.99±0.53a  | 5.15±0.55a  |
|                                 | 50            | 6.18±1.00a  | 6.68±1.28a  | 7.29±0.63a  | 4.74±0.40a  |
|                                 | 60            | 7.84±1.52a  | 7.20±1.02a  | 7.61±0.80a  | 6.04±0.29a  |
|                                 | 70            | 7.60±1.09ab | 7.89±1.64ab | 9.46±1.12a  | 5.60±0.74b  |
|                                 | 80            | 8.77±0.31a  | 7.91±0.24a  | 7.30±0.59ab | 5.10±0.07b  |
|                                 | 90            | 8.27±0.36a  | 6.50±1.00a  | 7.07±1.00a  | 5.66±0.30a  |
|                                 | 100           | 9.14±0.28a  | 5.25±0.85b  | 6.94±0.68ab | 6.74±1.44ab |
|                                 | 120           | 7.82±0.53a  | 5.37±0.90ab | 6.62±0.50ab | 4.77±0.06b  |
|                                 | 140           | 6.45±0.79a  | 6.39±0.40a  | 5.04±0.21a  | 3.87±0.40a  |
|                                 | 160           | 5.63±0.51a  | 4.14±0.13a  | 4.38±0.16a  | 5.93±1.87a  |
|                                 | 180           | 3.91±0.35a  | 3.15±0.12a  | 4.83±1.10a  | 4.96±1.51a  |
|                                 | 200           | 3.48±0.23a  | 2.74±0.14a  | 3.70±0.63a  | 3.53±0.39a  |

Results are reported as means ± SD (n = 3). Different letters within a row indicate significant differences between the treatments by LSD-Test least significant difference ( $p < 0.05$ ).

Table S5. Effects of long-term cover crops on total nitrogen content in the soil profile.

|    | Depth(cm) | FW          | RrG         | VvR         | OrV         |
|----|-----------|-------------|-------------|-------------|-------------|
| TN | 10        | 1.42±0.05b  | 1.63±0.01a  | 1.52±0.04ab | 1.64±0.03a  |
|    | 20        | 1.20±0.02bc | 1.42±0.01a  | 1.16±0.05c  | 1.31±0.01ab |
|    | 30        | 1.02±0.03b  | 1.03±0.04b  | 1.21±0.01a  | 1.05±0.03b  |
|    | 40        | 0.57±0.00c  | 0.89±0.04b  | 1.10±0.03a  | 0.88±0.04b  |
|    | 50        | 0.78±0.05b  | 1.03±0.02a  | 1.12±0.05a  | 1.07±0.00a  |
|    | 60        | 1.03±0.02b  | 1.14±0.02b  | 1.32±0.08a  | 1.12±0.04b  |
|    | 70        | 0.98±0.03b  | 1.11±0.05a  | 1.18±0.03a  | 1.15±0.05a  |
|    | 80        | 1.04±0.01b  | 1.20±0.05a  | 1.14±0.03ab | 1.17±0.01a  |
|    | 90        | 1.06±0.03a  | 1.17±0.02a  | 1.13±0.01a  | 1.14±0.01a  |
|    | 100       | 1.07±0.02a  | 1.07±0.04a  | 1.13±0.03a  | 1.10±0.03a  |
|    | 120       | 1.04±0.00ab | 1.11±0.08a  | 0.96±0.02b  | 1.10±0.02a  |
|    | 140       | 1.04±0.02b  | 1.10±0.05ab | 1.21±0.18a  | 0.74±0.03c  |
|    | 160       | 0.78±0.01a  | 0.78±0.03a  | 0.65±0.00b  | 0.86±0.01a  |
|    | 180       | 0.85±0.03b  | 0.98±0.05a  | 1.01±0.06a  | 0.91±0.04ab |
|    | 200       | 0.82±0.01c  | 1.05±0.06ab | 1.11±0.03a  | 0.99±0.03b  |

Results are reported as means  $\pm$  SD (n = 3). Different letters within a row indicate significant differences between the treatments by LSD-Test least significant difference ( $p < 0.05$ ).

Table S6. Abundances of AOB-*amoA*, AOA-*amoA*, *nirS*, *narG* *nirK*, *nosZ* genes in the soils under different cover crop treatments of fallow-spring corn ( FW ), ryegrass-spring corn ( RrG ), oryochopragmus violaceus-spring corn (OrV) and hairy vetch-spring corn ( VvR ) .

| Depth(cm) | Treatment | Gene copy numbers (copies/g dry soil) |                  |              |               |                 |              |
|-----------|-----------|---------------------------------------|------------------|--------------|---------------|-----------------|--------------|
|           |           | AOB- <i>amoA</i>                      | AOA- <i>amoA</i> | <i>nirS</i>  | <i>nirK</i>   | <i>narG</i>     | <i>nosZ</i>  |
| 10        | FW        | 4566267±3563647a                      | 4566267±3563647a | 76348±26833a | 117758±38023a | 584964±96565a   | 21856±3324a  |
|           | RrG       | 1794492±870235b                       | 1794492±870235b  | 33426±12855c | 67891±20598b  | 469600±243148ab | 22068±13421a |
|           | OrV       | 2294648±1311140b                      | 2294648±1311140b | 32402±11395c | 51535±28390b  | 424309±60621b   | 26464±265a   |
|           | VvR       | 2694243±2012945b                      | 2694243±2012945b | 51233±5430b  | 54439±16137b  | 534524±23481ab  | 25794±13253a |
| 30        | FW        | 955869±598919a                        | 955869±598919a   | 14191±4102b  | 77243±15888a  | 135067±57539a   | 11300±1058b  |
|           | RrG       | 644091±166994a                        | 644091±166994a   | 15037±7404b  | 51419±14395b  | 258683±156655a  | 11912±6487ab |
|           | OrV       | 1011870±422380a                       | 1011870±422380a  | 25878±6838ab | 63776±9138ab  | 271510±27638a   | 19527±943a   |
|           | VvR       | 930769±840097a                        | 930769±840097a   | 30906±7569a  | 39895±6673b   | 243358±219860a  | 9304±3186b   |
|           | FW        | 484371±110531a                        | 484371±110531a   | 8880±5055a   | 31579±14490a  | 76210±52071a    | 2671±1507b   |

|     |     |                |                |              |              |                |              |
|-----|-----|----------------|----------------|--------------|--------------|----------------|--------------|
| 60  | RrG | 401260±100005a | 401260±100005a | 15174±6287a  | 43995±5916a  | 112795±139280a | 11618±9880a  |
|     | OrV | 423383±52917a  | 423383±52917a  | 13706±2724a  | 33897±9821a  | 69980±24380a   | 4256±1059ab  |
|     | VvR | 554498±342966a | 554498±342966a | 21812±10144a | 38730±1251a  | 93103±37887a   | 10554±3048ab |
| 100 | FW  | 517157±171947a | 517157±171947a | 10699±7248a  | 31988±31354a | 59175±48535a   | 3430±1396a   |
|     | RrG | 482449±30879a  | 482449±30879a  | 17829±5200a  | 20580±5089a  | 36337±11581a   | 1966±1119a   |
|     | OrV | 559911±116193a | 559911±116193a | 10258±3058a  | 13696±3712a  | 61625±79129a   | 3187±2356a   |
|     | VvR | 314986±79846a  | 314986±79846a  | 13695±10983a | 18114±13753a | 50501±31393a   | 2380±2093a   |
| 140 | FW  | 443813±3045a   | 443813±3045a   | 10284±5913a  | 15360±10431a | 95976±57409a   | 3628±3323a   |
|     | RrG | 487125±39377a  | 487125±39377a  | 9204±3188a   | 7362±2947a   | 30330±23212a   | 948±452a     |
|     | OrV | 390339±97088a  | 390339±97088a  | 7009±3400a   | 12483±4086a  | 42977±39429a   | 5377±4287a   |
|     | VvR | 405941±258960a | 405941±258960a | 8570±2833a   | 11514±7262a  | 39948±30447a   | 2561±1000a   |
| 200 | FW  | 468786±46545a  | 468786±46545a  | 7117±1333a   | 13765±4706a  | 27951±13730a   | 1802±127a    |
|     | RrG | 569267±48980a  | 569267±48980a  | 8358±3807a   | 6625±1140a   | 36208±26087a   | 1314±390a    |
|     | OrV | 508399±126247a | 508399±126247a | 11328±8483a  | 6970±1857a   | 24420±9778a    | 1226±274a    |
|     | VvR | 313049±100640a | 313049±100640a | 9047±6393a   | 7126±1859a   | 24281±14380a   | 1237±110a    |

Note: Results are reported as means ± SD (n = 3). Different letters within a row indicate significant differences between the treatments by LSD-Test least significant difference (P<0.05).

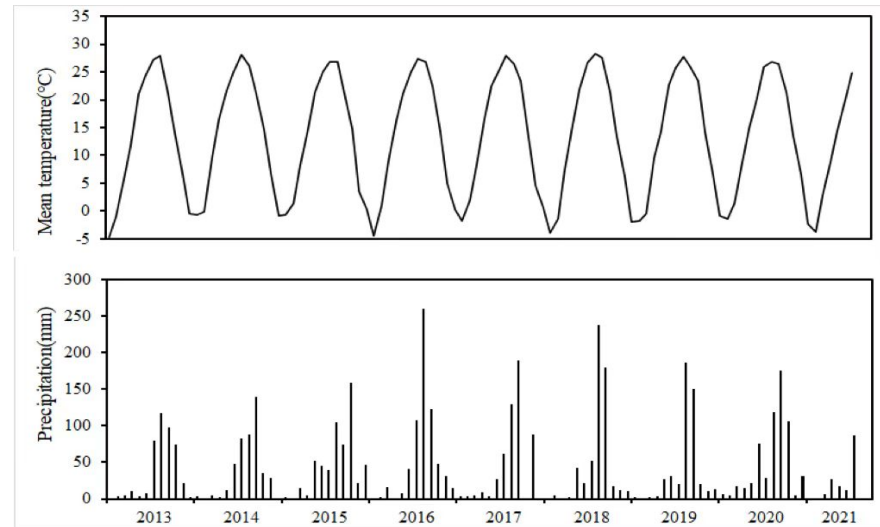

Figure S1. Mean monthly temperature and cumulative precipitation from January 2013 to May 2021 at the experimental site.



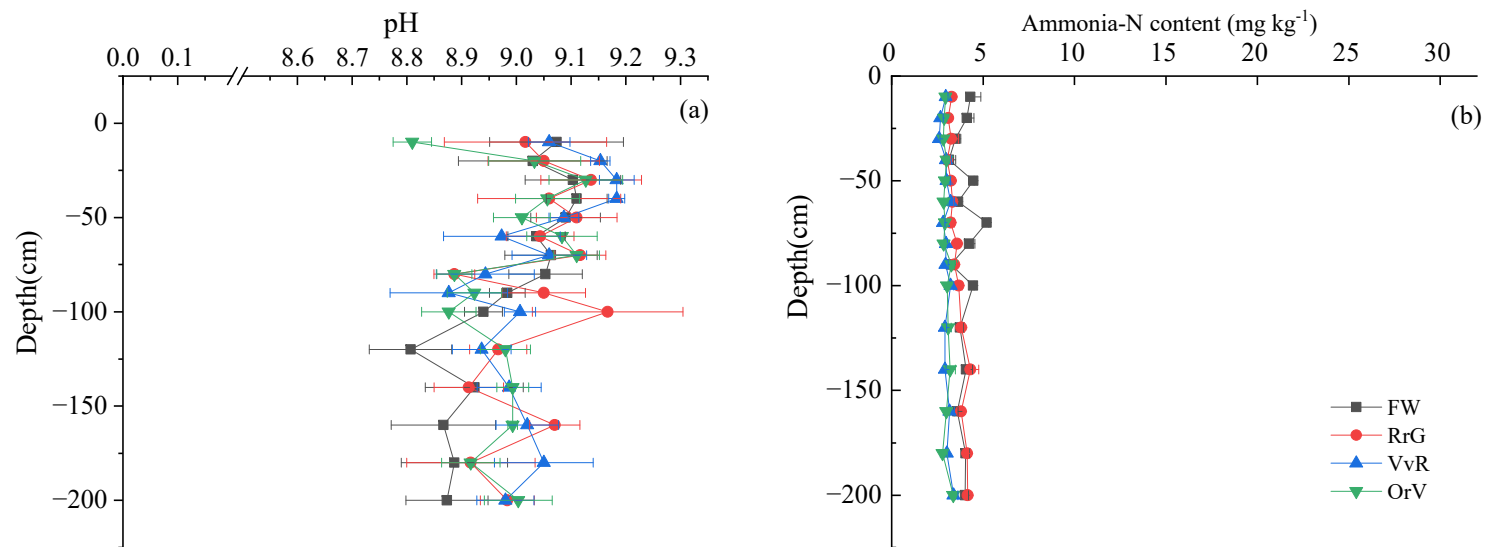

Figure S2. Effects of long-term cover crops on soil pH and ammonia-N content in the soil profile.

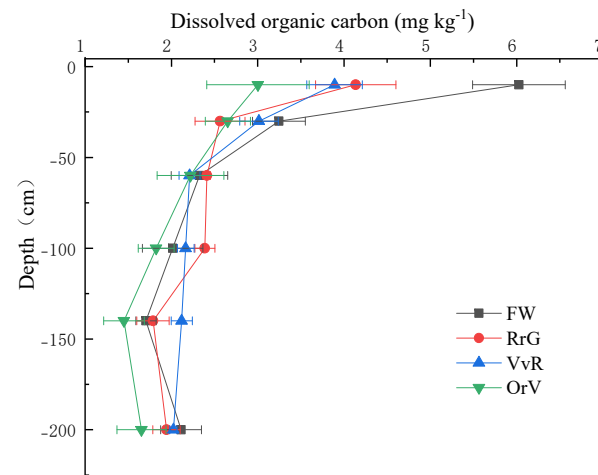

Figure S3. Effects of long-term cover crops on soil dissolved organic carbon in the soil profile.

---

## References (not listed in the main text)

- Di, H.J., Cameron, K.C., Podolyan, A., Robinson, A., 2014. Effect of soil moisture status and a nitrification inhibitor, dicyandiamide, on ammonia oxidizer and denitrifier growth and nitrous oxide emissions in a grassland soil. *Soil Biology and Biochemistry* 73, 59-68.
- Shi, Y., Liu, X., Zhang, Q., 2019. Effects of combined biochar and organic fertilizer on nitrous oxide fluxes and the related nitrifier and denitrifier communities in a saline-alkali soil. *Science of the Total Environment* 686, 199-211.
- Wang, J., Wang, J., Rhodes, G., He, J., Ge, Y., 2019. Adaptive responses of comammox *Nitrospira* and canonical ammonia oxidizers to long-term fertilizations: Implications for the relative contributions of different ammonia oxidizers to soil nitrogen cycling. *Science of the Total Environment* 668, 224-233.
- Wang, L., Xu, H., Liu, C., Yang, M., Zhong, J., Wang, W., Li, Z., Li, K., 2022. Stronger link of *nosZI* than *nosZII* to the higher total N<sub>2</sub>O consumption in anoxic paddy surface soils. *Geoderma* 425, 116035.
